# Supplementary material
Source: publisher site journal article supplement (https://www.spandidos-publications.com/7415/downloadSupplementary)
Supplement: Supplementary file 1 [file downloadSupplementary]

## Sheet: 475gene
Table SI. Custom panel of genes analyzed.
Gene name
ABCB1
ABCC2
ABL1
ABL2
ACTB
ADH1B
AIM1
AIP
AKT1
AKT2
AKT3
ALDH2
ALK
ANKRD26
AP3B1
APC
AR
ARHGAP26
ARID1A
ARID1B
ARID2
ARID5B
ASXL1
ASXL2
ASXL3
ATG5
ATM
ATR
ATRX
AURKA
AURKB
AXIN1
AXL
B2M
BAP1
BARD1
BCL10
BCL11B
BCL2
BCL2L1
BCL2L2
BCL6
BCL7A
BCOR
BCORL1
BCR
BIM (BCL2L11)
BIRC3
BIRC5
BLM
BMPR1A
BRAF
BRCA1
BRCA2
BRD4
BRIP1
BTG1
BTG2
BTK
BTLA
BUB1B
CALR
CARD11
CBFB
CBL
CBLB
CCND1
CCND2
CCND3
CCNE1
CCR4
CCT6B
CD22
CD274
CD28
CD58
CD70
CD74
CD79A
CD79B
CD83
CDA
CDC73
CDH1
CDK10
CDK12
CDK4
CDK6
CDK8
CDKN1B
CDKN1C
CDKN2A
CDKN2B
CDKN2C
CEBPA
CEP57
CHD8
CHEK1
CHEK2
CIITA
CKS1B
CMCT6
CREBBP
CSF1R
CSF3R
CTCF
CTLA4
CTNNB1
CUX1
CXCR4
CYLD
CYP19A1
CYP2A6
CYP2B6*6
CYP2C19*2
CYP2C9*3
CYP2D6
CYP3A4*4
CYP3A5*3
DAXX
DDR2
DDX3X
DDX41
DHFR
DHX15
DICER1
DNM2
DNMT3A
DNMT3B
DOT1L
DPYD
DTX1
DUSP2
DUSP22
EBF1
ECSIT
ECT2L
EED
EGFR
EGR1
EML4
EP300
EPCAM
EPHA2
EPHA3
ERBB2
ERBB3
ERBB4
ERCC1
ERCC2
ERCC3
ERCC4
ERCC5
ERG
ESR1
ETNK1
ETS1
ETV1
ETV4
ETV6
EWSR1
EZH2
FANCA
FANCC
FANCD2
FANCE
FANCF
FANCG
FANCL
FAS
FAT1
FAT4
FBXO11
FBXW7
FGFR1
FGFR2
FGFR3
FGFR4
FH
FIP1L1
FLCN
FLT1
FLT3
FLT4
FOXO1
FOXO3
FYN
GADD45B
GATA1
GATA2
GATA3
GNA11
GNA13
GNAQ
GNAS
GRIN2A
GSTM1
GSTP1
GSTT1
HACE1
HBA1
HBA2
HBB
HDAC1
HDAC2
HDAC4
HDAC7
HGF
HIST1H1E
HNF1A
HNF1B
HRAS
HSD3B1
ID3
IDH1
IDH2
IGF1R
IKBKE
IKZF1
IKZF2
IKZF3
IL7R
INPP4B
INPP5D
IRF1
IRF4
IRF8
ITPKB
JAK1
JAK2
JAK3
JARID2
JUN
KDM2B
KDM5A
KDM5C
KDM6A
KDR
KIF5B
KIR2DL4
KIR3DL2
KIT
KLF2
KLHL6
KLLN
KLRC1
KLRC2
KLRK1
KMT2A
KMT2B
KMT2C
KMT2D
KRAS
LAMP1
LEF1
LMO1
LMO2
LYN
LYST
MAF
MAFB
MALT1
MAP2K1
MAP2K2
MAP2K4
MAP3K1
MAP3K14
MAP4K3
MAPK1
MCL1
MDM2
MDM4
MED12
MEF2B
MEN1
MET
MFHAS1
MGA
MGMT
MITF
MLH1
MLH3
MPL
MRE11A
MSH2
MSH3
MSH6
MTHFR
MTOR
MUTYH
MYC
MYCL
MYCN
MYD88
MYH11
NAT1
NBN
NCSTN
NF1
NF2
NFKB1
NFKB2
NFKBIA
NFKBIE
NKX2-1
NOTCH1
NOTCH2
NPM1
NQO1
NRAS
NSD1
NT5C2
NTRK1
NTRK3
NUP98
P2RY8
PAG1
PAK3
PALB2
PAX5
PBRM1
PC
PDCD1
PDCD1LG2
PDE11A
PDGFRA
PDGFRB
PDK1
PGR
PHF6
PHOX2B
PIK3CA
PIK3CD
PIK3R1
PIK3R2
PIM1
PLCG2
PML
PMS1
PMS2
POLE
POT1
POU2AF1
PPM1D
PPP2R1A
PRDM1
PRF1
PRKAR1A
PRKCB
PTCH1
PTEN
PTPN1
PTPN11
PTPN13
PTPN2
PTPN6
PTPRD
PTPRK
PTPRO
RAB27A
RAC3
RAD21
RAD50
RAD51
RAF1
RARA
RASGEF1A
RB1
RECQL4
REL
RELN
RET
RHOA
RICTOR
RNF43
ROS1
RPTOR
RRM1
RUNX1
RUNX1T1
RUNX3
SBDS
SDC4
SDHA
SDHB
SDHC
SDHD
SERP2
SETBP1
SETD2
SF3B1
SGK1
SH2B3
SH2D1A
SLC34A2
SLC7A8
SMAD2
SMAD4
SMAD7
SMARCA4
SMARCB1
SMC1A
SMC3
SMO
SOCS1
SOX2
SPEN
SPOP
SRC
SRP72
SRSF2
SRY
STAG2
STAT3
STAT5A
STAT5B
STAT6
STIL
STK11
STMN1
STT3A
STX11
STXBP2
SUFU
SUZ12
SYK
TAL1
TBL1XR1
TBX21
TCF3
TCL1A
TEK
TEKT4
TERT
TET2
TGFBR2
TLE1
TLE4
TMPRSS2
TNFAIP3
TNFRSF11A
TNFRSF14
TNFRSF17
TNFRSF19
TOP1
TOP2A
TP53
TP63
TP73
TPMT
TRAF2
TRAF3
TRAF5
TSC1
TSC2
TSHR
TTF1
TUBB3
TYMS
U2AF1
UGT1A1
UNC13D
VEGFA
VHL
WHSC1
WT1
XIAP
XPC
XPO1
XRCC1
YAP1
ZAP70
ZBTB7A
ZNF2
ZRSR2

## Sheet: Sheet1
ABCB1		淋巴瘤类型	常见/重要基因变异																											DLBCL	PMBCL	PCNSL	MCL	BL	MZL	FL	CLL/SLL	LPL/WM	PTCL-NOS	AITL	ALCL	NKTCL	HL
ABCC2		DLBCL	KMT2D	PIM1	MYD88	TP53	CREBBP	B2M	CARD11	TNFAIP3	CDKN2A/B	BTG1	HIST1H1E	CD70	CD79B	CREBBP	EZH2	MEF2B	DTX1	TNFRSF14	NOTCH1/2	MYC重排	BCL2重排	BCL6重排	ATM	SGK1	TET2	ALK重排		KMT2D	STAT6	MYD88	CCND1重排	MYC	BIRC3::MALT1	KMT2D	MYD88	MYD88	TET2	RHOA	ALK重排	STAT3	NFKBIE
ABL1		PMBCL	STAT6	B2M	ACTB	SOCS1	GNA13	ITPKB	TP53	PTPN1	CIITA	CD58	CD274	PDCD1LG2	HIST1H1E	EZH2	TNFAIP3	XPO1	IRF2BP2	IRF4	IRF8	ZNF217								PIM1	B2M	CD79B	CCND2重排	ID3	BCL10重排	CREBBP	ATM	CXCR4	DNMT3A	IDH2	DUSP22重排	STAT5B	TNFAIP3
ABL2		PCNSL	MYD88	CD79B	CDKN2A/B	PIM1	B2M	CARD11	KMT2D	BTG2	DUSP2	ETV6																		MYD88	ACTB	CDKN2A/B	CCND3重排	TCF3	MALT1重排	TNFRSF14	TP53	ARID1A	KDM6A	TET2	TP63重排	SETD2	STAT6
ACTB		MCL	CCND1重排	CCND2重排	CCND3重排	ATM	KMT2D	CDKN2A/B	TP53	BCL10	BIRC3	BTK	NOTCH1/2	MALT1	MAP3K14	NSD2	PLCG2	SMARCA4	TRAF2	RB1										TP53	SOCS1	PIM1	ATM	CCND3	TNFAIP3	BCL2重排	SF3B1	CD79B	KMT2D	DNMT3A	STAT3	JAK3	PTPN1
ADH1B		BL	MYC	ID3	TCF3	CCND3	TP53	CDKN2A	DDX3X	PTEN	PIK3R1	ARID1A	SMARCA4	GNA13	ROCK1															CREBBP	GNA13	B2M	KMT2D	TP53	CARD11	SPEN	NOTCH1	BTK	TP53	CARD11	JAK1	TP53	B2M
AIM1		MZL	BIRC3::MALT1	BCL10重排	MALT1重排	TNFAIP3	CARD11	CD79B	MYD88	MAP3K14	CREBBP	CD274	GPR34	CCR6	FAS	PIK3CD	SLAMF1	KMT2D	NOTCH1/2	FOXP1	CD274	TNFRSF14	TET2	TRAF3	TP53	TBL1XR1				B2M	ITPKB	CARD11	CDKN2A/B	CDKN2A	CD79B	TNFRSF14	KMT2D	CARD11	CDKN2A	CD28	STAT5B	KMT2D	XPO1
AIP		FL	KMT2D	CREBBP	TNFRSF14	BCL2重排	SPEN	TNFRSF14	CIITA	IRF4	ARID1A	EP300	EZH2	FOXO1	STAT6	CARD11	CDKN2A	CDKN2B	MEF2B	TNFAIP3	TP53									CARD11	TP53	KMT2D	TP53	DDX3X	MYD88	CIITA	CARD11	TP53	FAT1	FYN	TP53	BCOR	ITPKB
AKT1		CLL/SLL	MYD88	ATM	TP53	SF3B1	NOTCH1	KMT2D	CARD11	BRAF	DUSP2	CDKN2A/B	BTK	BIRC3	MAP3K14	NSD2	PLCG2													TNFAIP3	PTPN1	BTG2	BCL10	PTEN	MAP3K14	IRF4	BRAF	PLCG2	CREBBP		BANK1	DDX3X	GNA13
AKT2		LPL/WM	MYD88	CXCR4	ARID1A	CD79B	BTK	CARD11	TP53	PLCG2																				CDKN2A/B	CIITA	DUSP2	BIRC3	PIK3R1	CREBBP	ARID1A	DUSP2		ARID1A		SOCS1	EP300	SOCS1
AKT3		PTCL-NOS	TET2	DNMT3A	KDM6A	KMT2D	TP53	CDKN2A	FAT1	CREBBP	ARID1A	KMT2C	SWTD2	EP300	IKZF2															BTG1	CD58	ETV6	BTK	ARID1A	CD274	EP300	CDKN2A/B		KMT2C		KMT2D	RAD21
ALDH2		AITL	RHOA	IDH2	TET2	DNMT3A	CARD11	CD28	FYN																					HIST1H1E	CD274		NOTCH1/2	SMARCA4	GPR34	EZH2	BTK		SWTD2		NOTCH1	ARID1A
ALK		ALCL	ALK重排	DUSP2重排	TP63重排	STAT3	JAK1	STAT5B	TP53	BANK1	SOCS	KMT2D	NOTCH1	TET2	KRAS															CD70	PDCD1LG2		MALT1	GNA13	CCR6	FOXO1	BIRC3		EP300		TET2	NOTCH1
ANKRD26		NKTCL	STAT3	STAT5B	SETD2	JAK3	TP53	KMT2D	BCOR	DDX3X	EP300	RAD21	ARID1A	NOTCH1																CD79B	HIST1H1E		MAP3K14	ROCK1	FAS	STAT6	MAP3K14		IKZF2		KRAS
AP3B1		HL	NFKBIE	TNFAIP3	STAT6	PTPN1	B2M	XPO1	ITPKB	GNA13	SOCS1																			CREBBP	EZH2		NSD2		PIK3CD	CARD11	NSD2
APC																														EZH2	TNFAIP3		PLCG2		SLAMF1	CDKN2A	PLCG2
AR																														MEF2B	XPO1		SMARCA4		KMT2D	CDKN2B
ARHGAP26																														DTX1	IRF2BP2		TRAF2		NOTCH1/2	MEF2B
ARID1A																														TNFRSF14	IRF4		RB1		FOXP1	TNFAIP3
ARID1B																														NOTCH1/2	IRF8				CD274	TP53
ARID2																														MYC重排	ZNF217				TNFRSF14
ARID5B																														BCL2重排					TET2
ASXL1																														BCL6重排					TRAF3
ASXL2																														ATM					TP53
ASXL3																														SGK1					TBL1XR1
ATG5																														TET2
ATM																														ALK重排
ATR
ATRX
AURKA
AURKB
AXIN1
AXL
B2M
BAP1
BARD1
BCL10
BCL11B
BCL2
BCL2L1
BCL2L2
BCL6
BCL7A
BCOR
BCORL1
BCR
BIM (BCL2L11)
BIRC3
BIRC5
BLM
BMPR1A
BRAF
BRCA1
BRCA2
BRD4
BRIP1
BTG1
BTG2
BTK
BTLA
BUB1B
CALR
CARD11
CBFB
CBL
CBLB
CCND1
CCND2
CCND3
CCNE1
CCR4
CCT6B
CD22
CD274
CD28
CD58
CD70
CD74
CD79A
CD79B
CD83
CDA
CDC73
CDH1
CDK10
CDK12
CDK4
CDK6
CDK8
CDKN1B
CDKN1C
CDKN2A
CDKN2B
CDKN2C
CEBPA
CEP57
CHD8
CHEK1
CHEK2
CIITA
CKS1B
CMCT6
CREBBP
CSF1R
CSF3R
CTCF
CTLA4
CTNNB1
CUX1
CXCR4
CYLD
CYP19A1
CYP2A6
CYP2B6*6
CYP2C19*2
CYP2C9*3
CYP2D6
CYP3A4*4
CYP3A5*3
DAXX
DDR2
DDX3X
DDX41
DHFR
DHX15
DICER1
DNM2
DNMT3A
DNMT3B
DOT1L
DPYD
DTX1
DUSP2
DUSP22
EBF1
ECSIT
ECT2L
EED
EGFR
EGR1
EML4
EP300
EPCAM
EPHA2
EPHA3
ERBB2
ERBB3
ERBB4
ERCC1
ERCC2
ERCC3
ERCC4
ERCC5
ERG
ESR1
ETNK1
ETS1
ETV1
ETV4
ETV6
EWSR1
EZH2
FANCA
FANCC
FANCD2
FANCE
FANCF
FANCG
FANCL
FAS
FAT1
FAT4
FBXO11
FBXW7
FGFR1
FGFR2
FGFR3
FGFR4
FH
FIP1L1
FLCN
FLT1
FLT3
FLT4
FOXO1
FOXO3
FYN
GADD45B
GATA1
GATA2
GATA3
GNA11
GNA13
GNAQ
GNAS
GRIN2A
GSTM1
GSTP1
GSTT1
HACE1
HBA1
HBA2
HBB
HDAC1
HDAC2
HDAC4
HDAC7
HGF
HIST1H1E
HNF1A
HNF1B
HRAS
HSD3B1
ID3
IDH1
IDH2
IGF1R
IKBKE
IKZF1
IKZF2
IKZF3
IL7R
INPP4B
INPP5D
IRF1
IRF4
IRF8
ITPKB
JAK1
JAK2
JAK3
JARID2
JUN
KDM2B
KDM5A
KDM5C
KDM6A
KDR
KIF5B
KIR2DL4
KIR3DL2
KIT
KLF2
KLHL6
KLLN
KLRC1
KLRC2
KLRK1
KMT2A
KMT2B
KMT2C
KMT2D
KRAS
LAMP1
LEF1
LMO1
LMO2
LYN
LYST
MAF
MAFB
MALT1
MAP2K1
MAP2K2
MAP2K4
MAP3K1
MAP3K14
MAP4K3
MAPK1
MCL1
MDM2
MDM4
MED12
MEF2B
MEN1
MET
MFHAS1
MGA
MGMT
MITF
MLH1
MLH3
MPL
MRE11A
MSH2
MSH3
MSH6
MTHFR
MTOR
MUTYH
MYC
MYCL
MYCN
MYD88
MYH11
NAT1
NBN
NCSTN
NF1
NF2
NFKB1
NFKB2
NFKBIA
NFKBIE
NKX2-1
NOTCH1
NOTCH2
NPM1
NQO1
NRAS
NSD1
NT5C2
NTRK1
NTRK3
NUP98
P2RY8
PAG1
PAK3
PALB2
PAX5
PBRM1
PC
PDCD1
PDCD1LG2
PDE11A
PDGFRA
PDGFRB
PDK1
PGR
PHF6
PHOX2B
PIK3CA
PIK3CD
PIK3R1
PIK3R2
PIM1
PLCG2
PML
PMS1
PMS2
POLE
POT1
POU2AF1
PPM1D
PPP2R1A
PRDM1
PRF1
PRKAR1A
PRKCB
PTCH1
PTEN
PTPN1
PTPN11
PTPN13
PTPN2
PTPN6
PTPRD
PTPRK
PTPRO
RAB27A
RAC3
RAD21
RAD50
RAD51
RAF1
RARA
RASGEF1A
RB1
RECQL4
REL
RELN
RET
RHOA
RICTOR
RNF43
ROS1
RPTOR
RRM1
RUNX1
RUNX1T1
RUNX3
SBDS
SDC4
SDHA
SDHB
SDHC
SDHD
SERP2
SETBP1
SETD2
SF3B1
SGK1
SH2B3
SH2D1A
SLC34A2
SLC7A8
SMAD2
SMAD4
SMAD7
SMARCA4
SMARCB1
SMC1A
SMC3
SMO
SOCS1
SOX2
SPEN
SPOP
SRC
SRP72
SRSF2
SRY
STAG2
STAT3
STAT5A
STAT5B
STAT6
STIL
STK11
STMN1
STT3A
STX11
STXBP2
SUFU
SUZ12
SYK
TAL1
TBL1XR1
TBX21
TCF3
TCL1A
TEK
TEKT4
TERT
TET2
TGFBR2
TLE1
TLE4
TMPRSS2
TNFAIP3
TNFRSF11A
TNFRSF14
TNFRSF17
TNFRSF19
TOP1
TOP2A
TP53
TP63
TP73
TPMT
TRAF2
TRAF3
TRAF5
TSC1
TSC2
TSHR
TTF1
TUBB3
TYMS
U2AF1
UGT1A1
UNC13D
VEGFA
VHL
WHSC1
WT1
XIAP
XPC
XPO1
XRCC1
YAP1
ZAP70
ZBTB7A
ZNF2
ZRSR2
